# Monocyte Adhesion to Decidual Endothelial Cells Is Increased in Pregnancies Complicated by Type 1 Diabetes but not by Gestational Diabetes

ANOULA GALETTIS, BSC<sup>1</sup>  
SUZANNE CAMPBELL, BSC, PHD<sup>1</sup>  
JONATHAN M. MORRIS, MBBS, MMED, PHD,  
FRACOG<sup>1</sup>

CHRISTOPHER J. JACKSON, BSC, PHD<sup>2</sup>  
STEVEN M. TWIGG, MBBS, PHD, FRACP<sup>3</sup>  
EILEEN D.M. GALLERY, MD(SYD), FRACP<sup>1</sup>

**T**ype 1 diabetes complicates ~1 of every 200 pregnancies and gestational diabetes a further 2–3% of pregnancies (1). Systemic atheromatous vascular disease can develop or accelerate during diabetic pregnancy. We and others (2) have observed similar vascular lesions in placental bed vessels (Fig. 1A) associated with impaired placental function and fetal growth.

Genesis of atheroma involves adherence of peripheral blood monocytes to endothelium (3–5). To determine whether a similar process underlies the placental bed vasculopathy of diabetes, we examined cell adhesion in an in vitro coculture system using decidual endothelial cells from normal pregnancies and monocytes from both normal and diabetic pregnancies.

## RESEARCH DESIGN AND METHODS

— This study was approved by the Human Research Ethics Committee of Royal North Shore Hospital. All subjects gave written informed consent.

Blood for monocyte isolation was collected from three groups of women, i.e., normal (control), type 1 diabetes (confirmed prepregnancy by a history of dia-

betic ketoacidosis and/or presence of anti-GAD antibodies), and gestational diabetes ( $n = 6$  in each group) groups, in the third trimester of pregnancy.

Endothelial cells were isolated from decidual biopsies collected from a separate group of nine healthy pregnant women at elective lower-segment caesarean section (6). Biopsies were diced, and after enzyme digestion, cells were purified by positive selection with lectin ulex europaeus 1 (UEA1; Sigma, St. Louis, MO), giving a population of endothelial cells of >95% purity. Cells were pooled at passage three, seeded ( $1.2 \times 10^5$  cells/well) onto collagen type IV-coated coverslips (Sigma; 10% vol/vol), and allowed to adhere for 5 h. Monocytes were isolated from venous blood from the three study groups using density gradient centrifugation (7), which avoids artifactual activation encountered in monocytes isolated by methods of adhesion (8). As assessed by CD68 positivity and CD3 negativity, the purity of the monocyte preparations was >90% in all cases.

## Monocyte adhesion to decidual endothelium

Monocytes from all subjects were seeded ( $2.5 \times 10^5$  cells/well) onto the decidual

endothelial cell monolayer in 2% FCS in medium 199. After duplicate 1-h incubations, nonadherent cells were removed by gentle washing. Remaining adherent cells, fixed in 4% paraformaldehyde, were stored at 4°C until analysis. Monocytes were identified with a mouse anti-human CD68 monoclonal antibody (clone EBM11; Dako, Glostrup, Denmark) and the endothelial monolayer visualized by counter-staining with hematoxylin. Cells in five random sections on each coverslip were counted by two independent observers blinded to donor monocyte source.

## Statistical methods

Data are presented as means  $\pm$  SE. Between-group comparisons were made using unpaired Student's *t* tests.

**RESULTS** — There was no statistically significant difference in gestational age among patient groups (data not shown) and no correlation between gestational age and level of monocyte adhesion in any group (control  $r^2 = 0.181$ ,  $P = 0.431$ ; type 1 diabetes  $r^2 = 0.208$ ,  $P = 0.394$ ; and gestational diabetes  $r^2 = 0.001$ ,  $P = 0.956$ ). All subjects had normal renal function and blood pressure. There was significant elevation of HbA<sub>1c</sub> levels in the type 1 diabetic group ( $7.0 \pm 0.53\%$ ;  $P < 0.01$ ) compared with the gestational diabetic group ( $4.7 \pm 0.13\%$ ).

## Adhesion of monocytes to decidual endothelium

Figure 1B shows representative immunocytochemical stains of monocytes and decidual endothelial cells in coculture and group data for the three groups. A significantly greater proportion of monocytes from women with type 1 diabetes adhered to the endothelial monolayer compared with that from normal pregnant women ( $P < 0.05$ ). There was no significant difference from normal in the level of adhe-

From the <sup>1</sup>Kolling Institute of Medical Research, University of Sydney, Royal North Shore Hospital, St. Leonards, Australia; the <sup>2</sup>Institute of Bone and Joint Research, University of Sydney, Royal North Shore Hospital, St. Leonards, Australia; and the <sup>3</sup>University of Sydney, Royal Prince Alfred Hospital, Camperdown, Australia.

Address correspondence and reprint requests to Professor Eileen Gallery, Level 3, Wallace Freeborn Building, Royal North Shore Hospital, St. Leonards, NSW 2065, Australia. E-mail: eileeng@med.usyd.edu.au.

Received for publication 18 May 2004 and accepted in revised form 6 July 2004.

© 2004 by the American Diabetes Association.

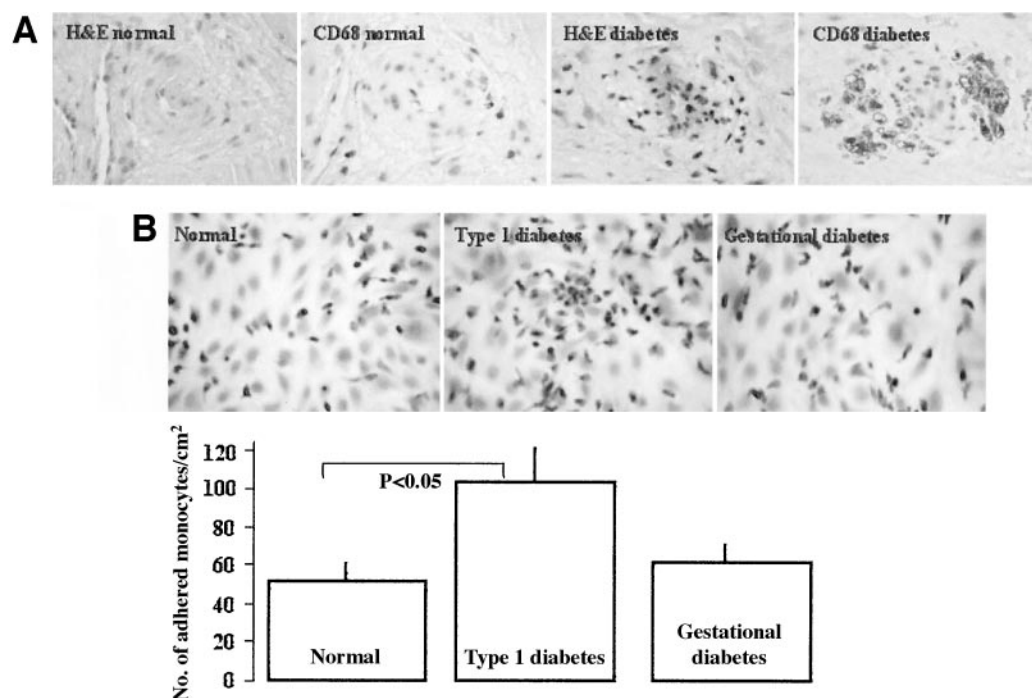

**Figure 1**—A: Placental bed biopsy (H&E [hematoxylin-eosin], CD68-stained normal and diabetic patients). The atheromatous vessel in the diabetic subject is totally occluded, with marked perivascular infiltration by lipid-laden CD68<sup>+</sup> macrophages. B: Adhesion of peripheral blood monocytes from normal, type 1 diabetic, and gestational diabetic pregnant women to a normal decidual endothelial cell monolayer. A representative section stained with CD68 (monocytes), counterstained with hematoxylin (endothelial cells), is shown with group data (mean ± SE, n = 6 in each group) below.

sion of monocytes from women with gestational diabetes.

**CONCLUSIONS**— The placental vascular bed is essential for the supply of nutrients to the feto-placental unit. The function of this vascular bed is seriously impaired by development of the atheroma-like vascular lesions seen in diabetic pregnancy. These lesions have been well described in the literature and have been shown to be most severe in those with poor glycemic control (9). Representative biopsies from a normal and a diabetic woman, each delivered by caesarean section in our unit, are shown in Fig. 1A. Since the majority of both normal and diabetic subjects in the current study delivered vaginally, placental bed biopsies were not able to be systematically collected.

Peripheral blood monocytes are preferentially recruited to the arterial intima early in the development of atheroma (3). They adhere to endothelium, migrate to the subendothelial space, and are transformed into lipid-laden foamy macrophages. They release proinflammatory cytokines, causing further endothelial activation and damage, further monocyte chemo-attraction, and acceleration of the vascular lesion (10).

We have described here, for the first time, increased adhesion to decidual endothelium of monocytes from pregnant

women with type 1 but not gestational diabetes. Such an increase could be the initial step in the development of placental bed vascular disease. Differences were not explicable on the basis of gestational age or ambient blood glucose levels, which were within the normal range at the time of blood collection in both diabetic groups. They may nevertheless have been related to duration and adequacy of glycemic control, as HbA<sub>1c</sub> levels were higher in the type 1 diabetic group.

Using this novel model, future work can investigate mechanisms by which this increased adhesiveness to placental bed endothelium occurs in diabetic pregnancy and its significance for monocyte migration to subendothelial space, initiation of inflammation, and reduction of placental blood flow.

**Acknowledgments**— This project was supported by grants-in-aid from the Diabetes Australia Research Trust (DART) and the Medical Advances without Animals (MAWA) Trust.

## References

- Engelgau MM, Herman WH, Smith PJ, German RR, Aubert RE: The epidemiology of diabetes and pregnancy in the U.S., 1988. *Diabetes Care* 18:1029–1033, 1995
- Kitzmiller JL, Watt N, Driscoll SG: Decidual arteriopathy in hypertension and dia-

betes in pregnancy: immunofluorescent studies. *Am J Obstet Gynecol* 141:773–779, 1981

- Schwartz CJ, Valente AJ, Sprague EA, Kelley JL, Nerem RM: The pathogenesis of atherosclerosis: an overview. *Clin Cardiol* 14:11–16, 1991
- Lusis AJ: Atherosclerosis. *Nature* 407:233–241, 2000
- Ross R: Atherosclerosis: an inflammatory disease. *N Engl J Med* 340:115–126, 1999
- Gallery ED, Rowe J, Schrieber L, Jackson CJ: Isolation and purification of microvascular endothelium from human decidual tissue in the late phase of pregnancy. *Am J Obstet Gynecol* 165:191–196, 1991
- Nutt JC, Willis CC, Morris JM, Gallery EDM: Isolating pure populations of monocytes from the blood of pregnant women: comparison of flotation in iodixanol with elutriation. *J Immunol Methods*. In press
- Wahl LM, Smith PD: Isolation of monocyte/macrophage populations. In *Current Protocols in Immunology*. Coligan JE, Kruisbeek AM, Margulies DH, Shevach EM, Strober W, Eds. New York, John Wiley & Sons, 1994, p. 7.6.1–7.6.8
- Semmler K, Emmrich P, Kirsch G, Fuhrmann K, Heinke P: Relation of uteroplacental circulation and morphologic findings in myometrial and decidual arteries in diabetic pregnancy. *Zentralblatt fur Gynakologie* 107:329–338, 1985
- Lopes-Virella MF, Virella G: Cytokines, modified lipoproteins, and arteriosclerosis in diabetes. *Diabetes* 45 (Suppl. 1):S40–S44, 1996
